# Supplementary material for: Proteomic Analysis of Porcine Pre-ovulatory Follicle Differentiation Into Corpus Luteum
Source: Front Endocrinol (Lausanne). 2019 Nov 15;10:774. doi: 10.3389/fendo.2019.00774 (PMC6879000; doi:10.3389/fendo.2019.00774)
Supplement: Supplementary file 2 [file Table_2.XLSX]

## Sheet: CL
Spot no.	Identified protein	POF1	POF2	POF3	POF4	ECL1	ECL2	ECL3	ECL4
7	protein-glutamine gamma-glutamyltransferase 2	0.0747126	0.0708258	0.072141	0.081243	0.185469	0.162057	0.196174	0.178551
11	NADH-ubiquinone oxidoreductase 75 kDa subunit	0.0296907	0.0185702	0.025418	0.031544	0.087465	0.0809746	0.0965217	0.071489
12	Ceruloplasmin	0.0180303	0.0394076	0.028365	0.031541	0.095478	0.0896119	0.103432	0.08211
29	albumin	0.060677	0.0972775	0.08517	0.078553	0.275163	0.28719	0.281252	0.315228
30	albumin	0.10721	0.115956	0.112418	0.098451	0.412544	0.439206	0.463931	0.395123
31	albumin	0.0561424	0.117035	0.065274	0.074135	0.548649	0.630738	0.742483	0.598971
32	albumin	0.0756843	0.124161	0.098633	0.098412	0.785438	0.901517	0.966405	0.824116
33	albumin	0.178252	0.109046	0.153196	0.186453	1.015148	1.28415	1.36931	1.142144
34	albumin	0.0411351	0.0493405	0.043574	0.051307	0.358418	0.486927	0.374319	0.421485
35	hyaluronidase	0.0453049	0.0462766	0.044681	0.051472	0.514831	0.564424	0.596706	0.495583
36	albumin	0.0246163	0.0438488	0.058412	0.033227	0.251547	0.260169	0.374961	0.425419
37	serpin A3-6	0.0467493	0.0428626	0.045281	0.041563	0.238896	0.236662	0.245839	0.265173
38	serpin A3-6	0.0324978	0.0384359	0.036632	0.041668	0.123482	0.121894	0.12157	0.126579
39	serpin A3-6	0.0966297	0.0740648	0.085119	0.079559	0.309841	0.317205	0.312238	0.321336
40	serpin A3-6	0.0376802	0.0430785	0.039245	0.041335	0.188513	0.180195	0.177604	0.191224
41	serpin A3-8	0.0213773	0.0245083	0.252415	0.031547	0.387465	0.521938	0.529603	0.048755
42	serpin A3-8	0.0552787	0.0915553	0.068214	0.052418	0.314587	0.344088	0.300038	0.334627
45	alpha-2-HS-glycoprotein	0.0401634	0.0236446	0.033214	0.065144	0.089485	0.0919872	0.0856171	0.074863
46	alpha-2-HS-glycoprotein	0.0204056	0.0520397	0.041257	0.035841	0.144152	0.104835	0.0895039	0.126552
47	alpha-2-HS-glycoprotein	0.0355209	0.0309863	0.032149	0.034182	0.180154	0.181275	0.183434	0.191337
48	alpha-2-HS-glycoprotein	0.0647797	0.0726612	0.068336	0.079627	0.298415	0.280928	0.276285	0.315429
49	prolyl 4-hydroxylase beta polypeptide	0.0321739	0.0419988	0.03827	0.026845	0.246871	0.200601	0.194879	0.269884
52	serpin A3-8	0.0559265	0.0687744	0.064392	0.049876	0.268413	0.270023	0.27553	0.251475
53	serpin A3-6	0.0548468	0.054199	0.055874	0.061412	0.261481	0.259011	0.260522	0.279168
54	serpin A3-8	0.10775	0.0819463	0.096217	0.089541	0.445218	0.432081	0.424091	0.51486
55	serpin A3-6	0.115848	0.12157	0.105369	0.132141	0.245567	0.264733	0.182463	0.316658
57	serpin A3-6	0.354753	0.183665	0.052117	0.145403	0.654118	0.437633	0.667015	0.591242
58	vitamin D-binding protein	0.103216	0.103755	0.102442	0.098412	0.486511	0.460044	0.513487	0.321581
60	antithrombin-III precursor	0.212369	0.172206	0.019548	0.015165	0.042455	0.468789	0.383928	0.055461
66	3-hydroxy-3-methylglutaryl-CoA synthase 1	0.0887482	0.0425387	0.055873	0.075619	0.115481	0.192935	0.186242	0.154146
73	glutathione synthetase	0.0443741	0.0421068	0.043981	0.051305	0.151549	0.101056	0.0981412	0.128638
109	eukaryotic initiation factor 4A-I	0.153528	0.18365	0.017328	0.166512	0.315487	0.367301	0.329729	0.354884
118	fibrinogen gamma chain precursor	0.034981	0.047937	0.042684	0.029217	0.156048	0.142839	0.179764	0.165479
119	fibrinogen gamma chain precursor	0.0419988	0.0428626	0.039582	0.048996	0.11214	0.103648	0.117467	0.121541
122	fibrinogen gamma chain precursor	0.0749285	0.0633761	0.071432	0.059841	0.191335	0.185918	0.217876	0.221565
123	aldehyde dehydrogenase, mitochondrial precursor	0.0523636	0.0309863	0.028547	0.045893	0.081135	0.119411	0.104336	0.095894
131	cytosol aminopeptidase-like	0.0945783	0.0648877	0.078523	0.085411	0.135413	0.223706	0.276501	0.184522
135	selenium binding protein 1	0.0165188	0.0171666	0.025227	0.021479	0.113172	0.225433	0.178553	0.134567
147	ribonuclease inhibitor	0.0539831	0.119626	0.08627	0.062451	0.165418	0.176201	0.161517	0.187614
161	gamma-enolase isoform 1	0.0307704	0.0330376	0.029253	0.026486	0.085647	0.0838897	0.0895039	0.095139
172	ornithine decarboxylase-like	0.0310942	0.0411351	0.035624	0.041763	0.081461	0.073309	0.0870207	0.092845
173	haptoglobin	0.0440502	0.0370324	0.040631	0.042514	0.115482	0.106886	0.116388	0.095452
174	haptoglobin	0.0485848	0.0409192	0.042177	0.031468	0.245873	0.267216	0.239145	0.033513
184	haptoglobin precursor	0.297339	0.300794	0.312027	0.322541	0.812469	0.82864	0.832743	0.895438
185	farnesyl pyrophosphate synthase precursor	0.0397315	0.0452378	0.042574	0.037451	0.084313	0.0825941	0.0782755	0.095147
193	nuclear distribution gene C homolog	0.0378961	0.0348731	0.035986	0.029586	0.065487	0.0785994	0.05733	0.073653
194	nuclear distribution gene C homolog	0.0162463	0.016827	0.012547	0.014586	0.031542	0.0345492	0.0273154	0.041587
216	tropomyosin beta chain	0.0592734	0.0466414	0.052419	0.061547	0.315487	0.350674	0.330592	0.325899
217	tropomyosin alpha-1 chain isoform X3	0.0310942	0.0481529	0.042083	0.025114	0.084212	0.0874526	0.0603531	0.094516
218	annexin I	0.0275314	0.0637	0.042826	0.037489	0.094651	0.0902597	0.0859411	0.106547
220	clusterin	0.0259119	0.022457	0.026533	0.024683	0.045548	0.0485848	0.0436854	0.051479
225	V-type proton ATPase subunit d 1	0.052798	0.0403939	0.076398	0.04517	0.095164	0.1161161	0.1042807	0.126173
228	clusterin precursor	0.0315722	0.0322819	0.025124	0.037562	0.051473	0.0625387	0.0507598	0.071451
229	catechol O-methyltransferase	0.0152641	0.0259002	0.035681	0.022839	0.057548	0.0425387	0.0469244	0.051487
232	farnesyl diphosphate synthase	0.0211614	0.0329297	0.028763	0.021864	0.084321	0.0864809	0.0876685	0.095461
233	eukaryotic translation initiation factor 2 subunit 1	0.0238605	0.0250481	0.026519	0.031254	0.051484	0.0517158	0.0568982	0.061259
235	farnesyl pyrophosphate synthase precursor	0.0267756	0.0441582	0.027561	0.034658	0.202548	0.209562	0.238173	0.226455
239	aldo-keto reductase family 1 member C4	0.0225649	0.0322819	0.028644	0.018142	0.132487	0.154931	0.12848	0.148674
241	glyceraldehyde-3-phosphate dehydrogenase	0.0131719	0.0231865	0.013248	0.019305	0.049516	0.0455617	0.0538343	0.051479
243	suppressor of G2 allele of SKP1 homolog	0.0385439	0.0364926	0.037522	0.029684	0.084512	0.0755763	0.0571141	0.065127
246	serine/threonine-protein phosphatase 2A catalytic subunit alpha	0.0188941	0.0275314	0.023557	0.021477	0.048157	0.0423227	0.0407032	0.056479
247	serine/threonine-protein phosphatase 2A catalytic subunit beta	0.0181383	0.0180303	0.01723	0.021543	0.045843	0.0444821	0.0397315	0.051201
249	serine/threonine-protein phosphatase 2A catalytic subunit beta	0.0181383	0.0346571	0.025983	0.020466	0.069542	0.0709338	0.0633761	0.076515
251	immunoglobulin-binding protein 1 isoform 2	0.0348731	0.0171666	0.021633	0.026135	0.048951	0.047721	0.0462095	0.051348
255	glutaredoxin 3	0.083026	0.0871287	0.085276	0.092471	0.165418	0.17253	0.157739	0.215478
256	glutaredoxin 3	0.0170587	0.0170587	0.018654	0.016543	0.088405	0.0928509	0.0771958	0.096521
257	F-actin capping protein subunit alpha 1	0.0775197	0.0884243	0.081279	0.074315	0.154807	0.162597	0.132582	0.165283
262	transaldolase	0.0344412	0.0335775	0.035276	0.029548	0.078456	0.0749285	0.0741727	0.084146
271	macrophage-capping protein-like isoform 3	0.0201897	0.0195419	0.018282	0.024542	0.085464	0.0910155	0.108398	0.089511
275	aldose reductase	0.0279632	0.0312022	0.028147	0.021584	0.115485	0.136253	0.0816224	0.109334
278	actin-related protein 2	0.0362766	0.0334695	0.035051	0.041556	0.11214	0.112933	0.110881	0.118622
279	leukocyte elastase inhibitor	0.0323898	0.0312022	0.02863	0.023169	0.065487	0.0705019	0.0498804	0.056457
280	trans-1,2-dihydrobenzene-1,2-diol dehydrogenase	0.0219171	0.0198658	0.020056	0.024665	0.064875	0.0624044	0.0531193	0.065145
281	aldose 1-epimerase	0.0210534	0.0240765	0.019564	0.028463	0.051268	0.0589495	0.0620805	0.060229
283	apolipoprotein E precursor	0.0322819	0.0436183	0.035147	0.021948	0.074513	0.10883	0.0564663	0.096307
288	enolase-phosphatase E1	0.0178144	0.0308783	0.026571	0.024661	0.065186	0.0637	0.054091	0.071235
292	elongation factor 1-delta-like isoform 2	0.0246163	0.0259119	0.025012	0.018549	0.101547	0.124269	0.0901517	0.115248
295	EF-hand domain-containing protein D2-like	0.0212693	0.0226058	0.018533	0.015412	0.039924	0.0367085	0.0383951	0.042156
300	tubulin-folding cofactor B-like	0.0373563	0.0306624	0.028745	0.035341	0.071891	0.0755763	0.0613248	0.084451
302	spermidine synthase	0.0326058	0.0342253	0.033142	0.039447	0.07548	0.0730931	0.0654275	0.082413
306	phenol sulfotransferase	0.0249402	0.0219988	0.019278	0.017652	0.035647	0.0412588	0.0439014	0.050159
311	elongation factor 1-beta	0.0968456	0.104403	0.099962	0.084655	0.186213	0.193367	0.175661	0.201351
313	tropomyosin 4	0.140464	0.153744	0.016549	0.121456	0.287515	0.294964	0.301333	0.325412
317	EF-hand domain-containing protein D2	0.0147914	0.0320659	0.018692	0.016413	0.048139	0.0583017	0.0328217	0.063547
320	proteasome subunit alpha type-3 isoform 2	0.0933907	0.0947943	0.093417	0.101587	0.191326	0.18419	0.147914	0.178521
322	chloride intracellular channel protein 5 isoform X2	0.0139276	0.0170587	0.015864	0.016223	0.031584	0.0384359	0.0294748	0.025806
335	cathepsin D protein	0.0453458	0.0265597	0.033662	0.041525	0.076518	0.0849694	0.073417	0.071217
340	phosphatidylinositol transfer protein	0.0332536	0.0328217	0.033853	0.021196	0.011305	0.128696	0.099005	0.111465
341	eukaryotic translation initiation factor	0.0171666	0.0193259	0.019872	0.021689	0.062143	0.0685585	0.0602451	0.071267
351	ubiquitin carboxyl-terminal hydrolase isozyme L3	0.0290429	0.0267756	0.030552	0.034147	0.058122	0.0607849	0.0512839	0.066823
356	rho GDP-dissociation inhibitor 1	0.125133	0.119842	0.010478	0.132784	0.255017	0.277041	0.248754	0.285416
357	NAD(P)H-hydrate epimerase	0.0131719	0.0164109	0.018281	0.017651	0.034219	0.0374307	0.0418909	0.045568
367	oligoribonuclease, mitochondrial-like	0.0184622	0.0161949	0.016963	0.021467	0.041232	0.0467493	0.05096	0.055213
369	putative ATP-dependent Clp protease proteolytic subunit, mitochondrial-like	0.0172746	0.0165188	0.017255	0.021553	0.039541	0.0367085	0.0428626	0.045148
372	oligoribonuclease, mitochondrial-like	0.0134958	0.0221331	0.016239	0.019228	0.036459	0.0344412	0.0342253	0.039514
374	cathepsin H transcript variant 3	0.0347651	0.0260198	0.032548	0.041258	0.075481	0.0618646	0.0578699	0.081254
378	peroxiredoxin-6	0.0226729	0.0163029	0.020236	0.027169	0.095154	0.0845375	0.101935	0.065412
379	steroidogenic acute regulatory protein, mitochondrial isoform X1	0.0165188	0.0218092	0.018521	0.022144	0.056274	0.057438	0.0581938	0.051213
380	pyridoxine-5'-phosphate oxidase	0.0165188	0.0136037	0.019429	0.015668	0.028787	0.0367085	0.0452115	0.029503
381	isopentenyl-diphosphate Delta-isomerase 1	0.0836738	0.104295	0.092852	0.087415	0.41248	0.443093	0.387598	0.521589
382	inorganic pyrophosphatase 2, mitochondrial-like	0.0170587	0.0194339	0.020583	0.029879	0.065134	0.079787	0.0707178	0.054316
383	cathepsin D protein	0.0265597	0.0353049	0.029004	0.021548	0.084123	0.0820543	0.0749285	0.069512
384	proteasome subunit alpha type-6 isoform 1	0.0251561	0.0236446	0.022147	0.031254	0.085137	0.127076	0.0693143	0.095145
385	heat shock protein beta-1	0.061048	0.112075	0.14524	0.091247	0.751485	0.765588	0.767639	0.068547
388	translationally-controlled tumor protein	0.124053	0.0914473	0.08684	0.098146	0.271584	0.30468	0.290537	0.251449
393	lactoylglutathione lyase isoform 1	0.0588415	0.0715815	0.066821	0.075413	0.149328	0.145214	0.140032	0.155218
394	peroxiredoxin-2	0.463283	0.508844	0.049236	0.051475	0.102019	0.964246	1.00063	0.121541
407	proteasome subunit beta type-3	0.0278553	0.0292588	0.030529	0.025416	0.062546	0.0671549	0.0602451	0.071531
414	ig kappa chain V-II region RPMI 6410	0.0239685	0.0481529	0.049324	0.031166	0.075662	0.0741728	0.0791392	0.083474
415	mitochondrial import receptor subunit TOM22 homolog	0.0168427	0.035089	0.025243	0.029419	0.028695	0.0458856	0.11358	0.038412
422	acireductone dioxygenase 1	0.02548	0.0232358	0.024821	0.019148	0.044357	0.0436183	0.0477546	0.051247
428	retinol-binding protein 4	0.0281792	0.0205136	0.025417	0.02941	0.084324	0.0788153	0.09555	0.062542
431	ferritin L subunit	0.0236446	0.0246163	0.024165	0.021544	0.067214	0.0688824	0.0693143	0.072541
434	glutathione peroxidase 3 precursor	0.0163029	0.0184622	0.014528	0.019425	0.095389	0.116603	0.100624	0.082548
441	coactosin-like protein-like	0.0514999	0.041358	0.03742	0.032569	0.099543	0.0987482	0.0941056	0.105693

## Sheet: POF
Table S2	Spot intensity of differentially regulated spots in ovarian follicles (POFs) and early corpus luteum (ECL)
Spot no.	Identified protein	POF1	POF2	POF3	POF4	ECL1	ECL2	ECL3	ECL4
2	94 kDa glucose-regulated protein	0.279308	0.300902	0.284996	0.232146	0.084795	0.0932828	0.0714736	0.098428
4	heat shock protein HSP 90-alpha	0.182571	0.171342	0.17865	0.198115	0.095349	0.0833499	0.105848	0.072549
13	neutral alpha-glucosidase AB precursor	0.0644558	0.0396236	0.048517	0.059138	0.021487	0.0268836	0.0336854	0.023871
22	78 kDa glucose-regulated protein	0.164864	0.152124	0.148531	0.158632	0.058746	0.0533353	0.0697461	0.047783
23	78 kDa glucose-regulated protein	0.198658	0.210426	0.201239	0.221557	0.054127	0.0610009	0.0388678	0.068331
62	60 kDa heat shock protein, mitochondrial	0.701888	0.62396	0.651478	0.671248	0.394581	0.33033	0.266414	0.031526
75	T-complex protein 1 subunit theta-like isoform 3	0.190668	0.157631	0.165847	0.132549	0.084321	0.0953341	0.0881004	0.07412
77	protein disulfide-isomerase A3 precursor	0.0842136	0.0705019	0.084613	0.078543	0.031543	0.0197578	0.0402714	0.026545
85	histone-binding protein RBBP4	0.398287	0.395048	0.384488	0.42587	0.115479	0.129667	0.140464	0.110219
86	protein kinase, cAMP-dependent, regulatory, type II, beta	0.0607849	0.0494485	0.066541	0.03215	0.012541	0.0144675	0.0105807	0.019546
87	cAMP-dependent protein kinase type II-alpha regulatory subunit	0.162705	0.197794	0.181134	0.144233	0.054132	0.0645638	0.0357368	0.058857
88	cAMP-dependent protein kinase type II-alpha regulatory subunit	0.169075	0.193475	0.186847	0.164521	0.065471	0.0846455	0.0737409	0.079553
89	cAMP-dependent protein kinase type II-alpha regulatory subunit	0.172746	0.152772	0.164871	0.158691	0.031487	0.0369244	0.0259119	0.041274
101	26S proteasome non-ATPase regulatory subunit 5	0.124161	0.126536	0.119457	0.095842	0.049214	0.047721	0.0513919	0.056772
112	TXNDC5 protein	0.0721214	0.0641319	0.06419	0.058741	0.029103	0.0321739	0.0275314	0.025881
113	septin 2	0.0917712	0.0602451	0.084782	0.068794	0.029547	0.0324978	0.0260198	0.021475
114	ruvB-like 2	0.168319	0.110773	0.175431	0.213698	0.752146	0.0657514	0.0725532	0.079852
129	alpha-enolase	0.253181	0.161841	0.194631	0.217808	0.092544	0.104619	0.122542	0.082457
133	guanosine diphosphate dissociation inhibitor 2	0.114228	0.0629443	0.091215	0.081547	0.038271	0.0448059	0.031958	0.028548
137	reticulocalbin 2, EF-hand calcium binding domain precursor	0.468789	0.464254	0.452392	0.514785	0.081776	0.0842136	0.0886402	0.091456
139	calumenin	0.199737	0.184838	0.174153	0.194255	0.022368	0.0217012	0.0172746	0.015472
140	calumenin	0.127724	0.126644	0.115472	0.131369	0.043241	0.0547388	0.0244003	0.035415
141	calumenin	0.200709	0.183327	0.193476	0.265663	0.055744	0.095766	0.04459	0.068584
142	calumenin	0.265057	0.244435	0.211579	0.195418	0.085292	0.0929589	0.0614327	0.075118
143	calumenin	0.191856	0.161841	0.175484	0.111447	0.051547	0.044698	0.0746046	0.082571
145	reticulocalbin-3	0.360175	0.356504	0.371512	0.290459	0.114842	0.141652	0.135605	0.015649
148	vimentin	0.124593	0.127292	0.121427	0.137471	0.042741	0.0390837	0.0594893	0.051402
149	vimentin	0.45281	0.424739	0.412716	0.51149	0.151472	0.175013	0.165512	0.131587
150	vimentin	0.104619	0.107534	0.101219	0.111228	0.027847	0.0310942	0.0232127	0.021544
152	vimentin	0.167887	0.141975	0.159873	0.142587	0.044528	0.0498804	0.0512839	0.045871
154	vimentin	0.0847534	0.0890721	0.081475	0.095447	0.027414	0.0301226	0.0294748	0.019551
155	vimentin	0.0613248	0.0654275	0.062548	0.072451	0.021549	0.0249402	0.0246163	0.018643
157	vimentin	0.066939	0.0717975	0.079543	0.061544	0.023783	0.0259119	0.0218092	0.024874
166	heat shock cognate 71 kDa protein-like	0.0499883	0.0679107	0.051754	0.045472	0.018793	0.019218	0.0172746	0.017502
205	succinyl-CoA ligase [ADP-forming] subunit beta, mitochondrial	0.0553866	0.0337934	0.045184	0.049585	0.019337	0.0153312	0.0280712	0.021548
214	protein SET	0.183974	0.145106	0.164241	0.151436	0.071229	0.0773038	0.0878844	0.069557
230	estradiol 17-beta-dehydrogenase 1	0.306084	0.264841	0.282156	0.278451	0.051473	0.0481529	0.0657514	0.05897
269	isocitrate dehydrogenase [NAD] subunit alpha, mitochondrial	0.161949	0.142731	0.151237	0.195486	0.041528	0.0456697	0.0508521	0.048656
272	3-hydroxyisobutyryl-CoA hydrolase, mitochondrial-like	0.0776277	0.0726612	0.079157	0.085214	0.039436	0.041567	0.0405953	0.034551
273	NADH dehydrogenase [ubiquinone] 1 alpha subcomplex subunit 10, mitochondrial	0.083026	0.0586256	0.061574	0.074893	0.035118	0.0359527	0.0339014	0.029845
309	mitochondrial complement component 1 Q subcomponent-binding protein	0.215716	0.18635	0.195422	0.231478	0.105149	0.103	0.101272	0.098545
326	prohibitin	0.24789	0.222895	0.218471	0.265845	0.121586	0.123621	0.127184	0.125474
347	vimentin	0.133338	0.152232	0.142365	0.198742	0.016488	0.0178144	0.0174905	0.019877
387	chromobox protein homolog 1	0.119842	0.0716895	0.094187	0.098543	0.024754	0.0321739	0.028611	0.035487
411	heat shock protein 27	0.0939305	0.0878844	0.081247	0.794874	0.032487	0.0359527	0.0300146	0.284785
417	myosin regulatory light polypeptide 9	0.0567902	0.0837817	0.062148	0.074564	0.019542	0.0169507	0.0172746	0.022154
418	diablo homolog, mitochondrial-like	0.0951182	0.0595973	0.084216	0.074589	0.025874	0.0252641	0.0240765	0.028548
419	programmed cell death protein 6	0.0627283	0.0471812	0.054789	0.051548	0.027853	0.0302305	0.0262358	0.023544
421	chromobox protein homolog 3-like isoform 2	0.0525795	0.0320659	0.042115	0.047952	0.021547	0.022241	0.022241	0.017849
429	ATP synthase, H+ transporting, mitochondrial Fo complex,	0.196498	0.181707	0.192386	0.215471	0.085442	0.0912314	0.0815144	0.084756
435	myosin light chain isoform LC17a	0.173178	0.165512	0.154821	0.164821	0.051472	0.0558185	0.0486927	0.053472
446	chloride intracellular channel protein 4-like	0.0599212	0.0608929	0.061234	0.601498	0.027118	0.028611	0.0268836	0.27495
